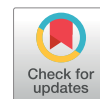

# Erratum

## **Erratum. Basal Glucose Can Be Controlled, but the Prandial Problem Persists—It's the Next Target! Diabetes Care 2017;40:291–300**

*Matthew C. Riddle*

<https://doi.org/10.2337/dc17-er08b>

In the above-mentioned article, there are two corrections to the text:

On page 294, in the second sentence under the heading “GLP-1 Receptor Agonists,” it reads “. . .dulaglutide (Tresiba). . .” This should read “dulaglutide (Trulicity).”

On page 295, in the paragraph beginning, “A smaller but similarly designed study. . .,” in the sentence beginning “Glucose values were in the 70–80 mg/dL range. . .,” the sentence should read “Glucose values were in the 70–180 mg/dL range. . .”

The online version of this article has been corrected to reflect these changes.
